# Supplementary material
Source: publisher figshare collection journal article supplement (https://tandf.figshare.com/ndownloader/files/15563594)
Supplement: Supplementary file 1 [file 15563594]

## Supplementary Materials

**Supplementary Table S1. Full distribution of states**

| Main activity in recorded year                                  | Code | Frequency | Percent |
|-----------------------------------------------------------------|------|-----------|---------|
| 1 Full access, No school/work, No shocks                        | AMS  | 121       | 1.05    |
| 2 Full access, School/work, No shocks                           | ANS  | 1,158     | 11.09   |
| 3 Full access, Work, No shock                                   | AOS  | 96        | 0.9     |
| 4 Full access, No school/work Family shock                      | AMT  | 64        | 0.54    |
| 5 Full access, School/work, Family shock                        | ANT  | 467       | 4.25    |
| 6 Full access, Work, Family shock                               | AOT  | 46        | 0.47    |
| 7 Full access, No school/work, Economic shock +/- family shock  | AMU  | 21        | 0.18    |
| 8 Full access, School/work, Economic shock +/- family shock     | ANU  | 148       | 1.23    |
| 9 Full access, Work, Economic shock +/- family shock            | AOU  | 12        | 0.09    |
| 10 Some access, No school/work, No shocks                       | BMS  | 694       | 5.39    |
| 11 Some access, School/work, No shocks                          | BNS  | 4,476     | 36.16   |
| 12 Some access, Work, No shock                                  | BOS  | 488       | 3.84    |
| 13 Some access, No school/work, Family shocks                   | BMT  | 369       | 2.91    |
| 14 Some access, School/work, Family shock                       | BNT  | 2,334     | 18.3    |
| 15 Some access, Work, Family shock                              | BOT  | 239       | 1.83    |
| 16 Some access, No school/work, Economic shock +/- family shock | BMU  | 62        | 0.46    |
| 17 Some access, School/work, Economic shock +/- family shock    | BNU  | 554       | 4.2     |
| 18 Some access, Work, Family &/or economic shock                | BOU  | 34        | 0.3     |
| 19 No access, No school/work, No shocks                         | CMS  | 155       | 1.17    |
| 20 No access, School/work, No shocks                            | CNS  | 294       | 2.44    |
| 21 No access, Work, No shock                                    | COS  | 14        | 0.1     |
| 22 No access, No school/work, Family shock                      | CMT  | 90        | 0.67    |
| 23 No access, School/work, Family shock                         | CNT  | 259       | 1.96    |
| 24 No access, Work, Family shock                                | COT  | 9         | 0.07    |
| 25 No access, No school/work, Economic shock +/- family shock   | CMU  | 17        | 0.13    |
| 26 No access, School/work, Economic shock +/- family shock      | CNU  | 33        | 0.26    |
| 27 No access, Work, Economic shock +/- family shock             | COU  | 2         | 0.01    |
| Total                                                           |      | 12,256    |         |

Notes: Full(A)/Some(B)/No(C) access: Home has access to all/some/none of electricity, own toilet, piped drinking water, adequate fuels for cooking. No School/work (M); neither in school nor work. School/work (N); in school and not working or also working (states combined as very few observations in which child is in school and working (n=363)). Work (O); working only.

No shock (S); no family or economic shock suffered. Family shock (T); suffered family shock (divorce, separation, family death or illness) but not any economic shock; Economic shock +/- family shock (U); suffered economic shock (loss of employment or source of income or family enterprise) either with or without also suffering a family

shock (states combined as relatively few observations in which an economic shock is suffered without a family shock (n=501))

**Supplementary Table S2. Interpretation of DiD interaction effects in ordered logit HEALTH and WELLBEING estimates: Marginal effects at baseline and last round and difference-in-differences.**

| Cluster | HEALTH<br>Baseline | HEALTH<br>Last<br>Round | Difference-in-<br>differences | WELLBEING<br>Baseline | WELLBEING<br>Last round | Difference-in-<br>differences |
|---------|--------------------|-------------------------|-------------------------------|-----------------------|-------------------------|-------------------------------|
| 2       | -0.0646            | -0.0584                 | +0.0064                       | -0.0629               | -0.0253                 | +0.041*                       |
| 3       | 0.0131             | -0.0673                 | -0.0804*                      | -0.0112               | 0.0004                  | +0.0211**                     |
| 4       | -0.0895            | 0.0150                  | +0.0823***                    | -0.0574               | -0.0252                 | +0.0826**                     |
| 5       | -0.0520            | -0.0419                 | +0.0101                       | -0.0457               | -0.0229                 | +0.0686**                     |
| 6       | -0.0088            | -0.0266                 | -0.0178                       | -0.0202               | -0.0120                 | +0.0322**                     |

Notes: Marginal/discrete effects of clusters calculates with as observed values of all the other covariates (average marginal effects) for the probability of reporting (1) good/very good health and (2) the mean level of wellbeing (5) relative to cluster 1. The difference-in-differences are the discrete changes between the marginal effects of each cluster at the baseline and last round A positive (negative) difference-in difference represents a more (less) positive marginal effect in the last round i.e. a narrowing (widening) difference/gap. A positive marginal effect in the last round indicates that the health/wellbeing gap has closed.

**Supplementary Table S3. Robustness test results for alternative health measure**

|                                                                    |                    | (1a) OLS              | (1b) O. Logit           |
|--------------------------------------------------------------------|--------------------|-----------------------|-------------------------|
| Independent variable                                               | Dependent variable | HEALTH2 ( $\beta$ )   | HEALTH2 ( $e^{\beta}$ ) |
| LAST_ROUND                                                         |                    | 0.00341<br>(0.128)    | 1.100<br>(0.380)        |
| Cluster 2 <i>Early transition to adult states</i>                  |                    | -0.171***<br>(0.0524) | 0.602***<br>(0.0857)    |
| Cluster 3 <i>Transitioning to better-off</i>                       |                    | -0.00353<br>(0.0593)  | 1.000<br>(0.160)        |
| Cluster 4 <i>Poor-to-average &amp; some instability</i>            |                    | -0.176***<br>(0.0682) | 0.597***<br>(0.112)     |
| Cluster 5 <i>Average but unstable</i>                              |                    | -0.167***<br>(0.0545) | 0.630***<br>(0.0944)    |
| Cluster 6 <i>Average &amp; stable</i>                              |                    | -0.0821<br>(0.0499)   | 0.798*<br>(0.108)       |
| LAST_ROUND*Cluster 2 <i>Early transition to adult states</i>       |                    | 0.00764<br>(0.0643)   | 1.061<br>(0.184)        |
| LAST_ROUND*Cluster 3 <i>Transitioning to better-off</i>            |                    | -0.102<br>(0.0821)    | 0.726<br>(0.160)        |
| LAST_ROUND*Cluster 4 <i>Poor-to-average &amp; some instability</i> |                    | 0.261***              | 2.041***                |

|                                                  |            |            |
|--------------------------------------------------|------------|------------|
|                                                  | (0.0809)   | (0.453)    |
| LAST_ROUND*Cluster 5 <i>Average but unstable</i> | 0.126*     | 1.358*     |
|                                                  | (0.0680)   | (0.252)    |
| LAST_ROUND*Cluster 6 <i>Average &amp; stable</i> | 0.0115     | 1.003      |
|                                                  | (0.0616)   | (0.166)    |
| Female                                           | -0.183***  | 0.620***   |
|                                                  | (0.0199)   | (0.0338)   |
| Age (in months)                                  | -0.0346    | 0.895      |
|                                                  | (0.0295)   | (0.0717)   |
| Education of household head                      | 0.00568**  | 1.014*     |
|                                                  | (0.00268)  | (0.00737)  |
| Female household head                            | -0.0830*** | 0.796***   |
|                                                  | (0.0264)   | (0.0579)   |
| Age of household head                            | -0.000681  | 0.998      |
|                                                  | (0.000990) | (0.00271)  |
| Rural location                                   | -0.00164   | 1.029      |
|                                                  | (0.0290)   | (0.0826)   |
| India                                            | -0.234***  | 0.415***   |
|                                                  | (0.0333)   | (0.0391)   |
| Peru                                             | -0.549***  | 0.166***   |
|                                                  | (0.0387)   | (0.0183)   |
| Vietnam                                          | -0.768***  | 0.0895***  |
|                                                  | (0.0319)   | (0.00859)  |
| Constant/Cutpoint 1                              | 4.937***   | -9.296     |
|                                                  | (0.449)    | (1.237)    |
| Observations                                     | 5,149      | 5,149      |
| R <sup>2</sup> / Pseudo R <sup>2</sup>           | 0.179      | 0.099      |
| F/LR Chi <sup>2</sup>                            | 55.75***   | 1186.58*** |

Notes: HEALTH2 records only self-rated child health reported in survey rounds 3-4.

Reported figures are coefficients ( $\beta$ ) for OLS and odds ratios ( $e^{\beta}$ ) for ordered logit.

Only cutpoint 1 value reported for ordered logit.

Standard errors in parentheses; \*  $p < 0.10$ , \*\*  $p < 0.05$ , \*\*\*  $p < 0.01$ .
